# Supplementary material for: Virtual Surgical Planning and Patient-Specific Instruments for Correcting Lower Limb Deformities in Pediatric Patients: Preliminary Results from the In-Office 3D Printing Point of Care
Source: MDPI journal article supplement (doi:10.3390/jpm13121664), 2023-11-28

## PLANNING REPORT

|                           |                                                                     |                   |
|---------------------------|---------------------------------------------------------------------|-------------------|
| <b>Patient Name:</b>      | Name: XXXXXXXX                                                      | Surname: XXXXXXXX |
| <b>Patient ID:</b>        | IDXXXXXX                                                            |                   |
| <b>Surgery date:</b>      | XX / XX / XXXX                                                      |                   |
| <b>Surgeon:</b>           | Dott. XXXXXX                                                        |                   |
| <b>Bone graft:</b>        | <input checked="" type="checkbox"/> Yes <input type="checkbox"/> No |                   |
| <b>Donor ID</b>           | IDXXXXXX                                                            |                   |
| <b>Hardware required:</b> | 3,5 mm cannulated screws                                            |                   |
| <b>Other:</b>             |                                                                     |                   |

### Surgery notes:

---

---

---

---

---

---

---

---

---

---

### Planned PSI: 1

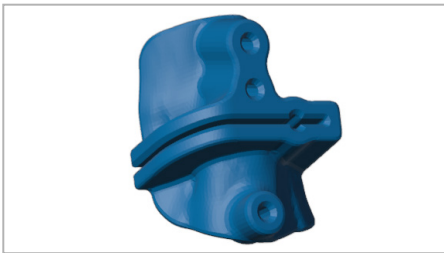

**Mask ID:**  
IDXXXXXX\_MTD

## Planning references:

IDXXXXXX\_MTD placement, proximal  $\varnothing 2\text{mm}$  K-wire insertion, and ampliscopic control

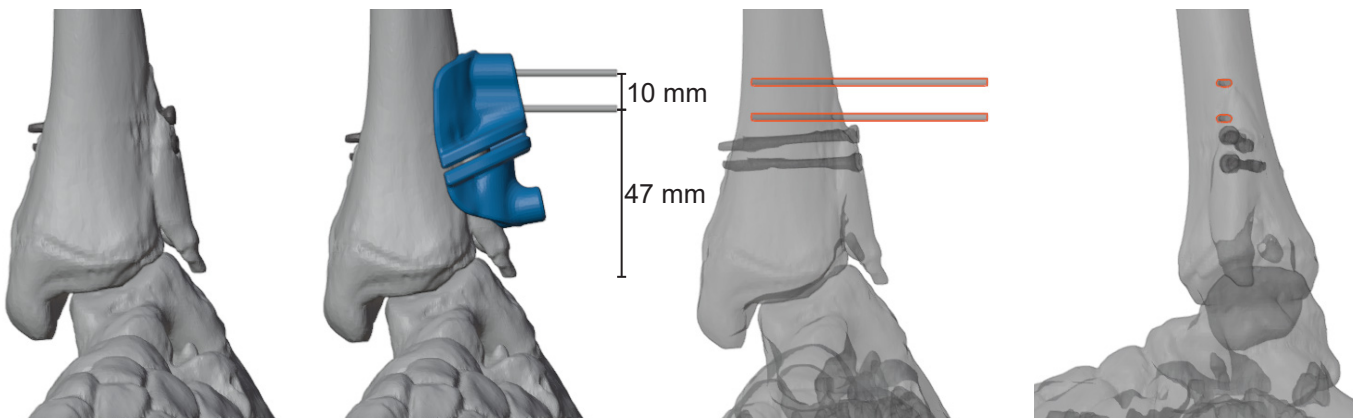

IDXXXXXX\_MTD removal for hardware removal, IDXXXXXX\_MTD reinsertion on proximal K-wires and distal K-wire insertion (if desired, also K-wire for cutting), ampliscopic control

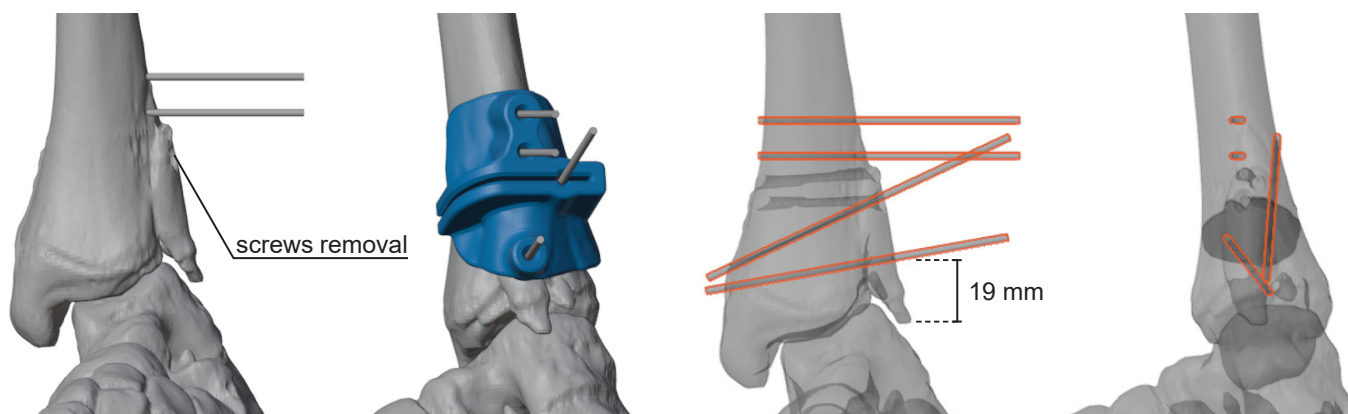

Osteotomy,  $25^\circ$  varus correction, bone wedge insertion

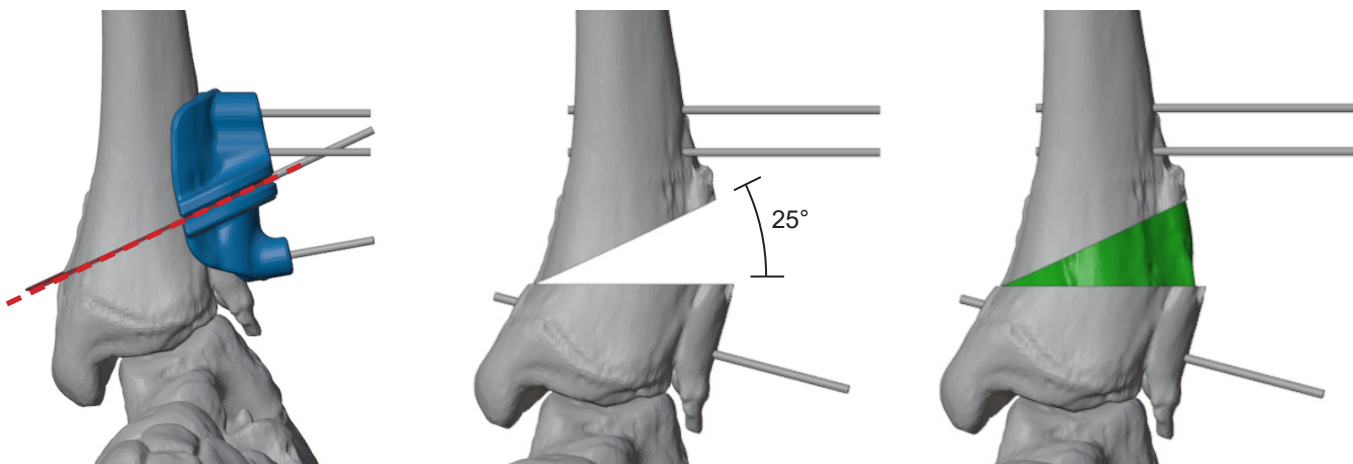

Fixation with 2 cannulated 3,5 mm screws

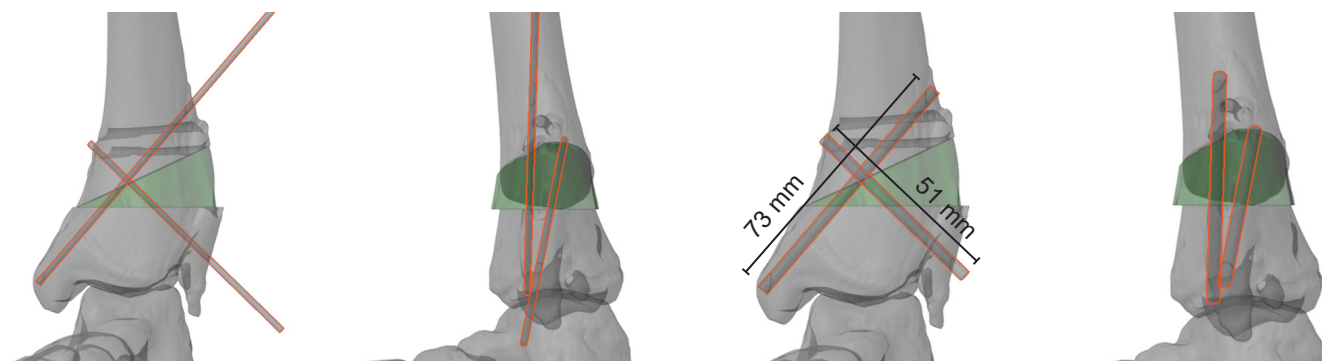

Supplement: s1 [file s1]
